# Supplementary material for: Dark blue azo dye degradation by the electro-Fenton process and reaction mechanism prediction via theoretical Fukui function analysis
Source: Royal Society of Chemistry journal article supplement (doi:10.1039/d4nj02367f), 2024-01-01
Supplement: d4nj02367f1.pdf [file d4nj02367f1.pdf]

## Dark Blue Azo Dye Degradation by Electro-Fenton process and reaction mechanism prediction via theoretical Fukui Function Analysis

Nour El Houda Slama<sup>1</sup>, Ghazza Masmoudi\*<sup>1</sup>, Maksym Fizer<sup>2,3</sup>, Abdelkarim Mahdhi<sup>4</sup>, Ruslan Mariychuk<sup>5</sup> and Hatem Dhaouadi<sup>1</sup>

<sup>1</sup> Laboratory of Environmental Chemistry and Clean Processes, Faculty of Sciences of Monastir, University of Monastir, Tunisia.

<sup>2</sup> Department of Organic Chemistry, Educational Scientific Institute of Chemistry and Ecology, Uzhhorod National University, Fedinets, Str. 53/1, Uzhhorod, 88000, Ukraine.

<sup>3</sup> Department of Chemistry, University of Nevada, Reno, 1664 N. Virginia Street, Reno, NV 89557-0216, USA

<sup>4</sup> Laboratory of Analysis, Treatment and Valorization of Environmental Pollutants and Products, Faculty of Pharmacy, Monastir University, Monastir, Tunisia

<sup>5</sup> Department of Ecology, Faculty of Humanities and Natural Sciences, University of Presov, 17<sup>th</sup> November str. 1, Presov, 08001, Slovakia.

\*Corresponding author. Tel: +21650695670. Email. [ghazza.massmoudi@fsm.u-monastir.tn](mailto:ghazza.massmoudi@fsm.u-monastir.tn)  
(Ghazza Masmoudi), 16-digit ORCID identifier 0000-0002-4236-2224

### Supplementary information

Optimized structures and radical Fukui function plot of species considered in the degradation mechanism of DBA.

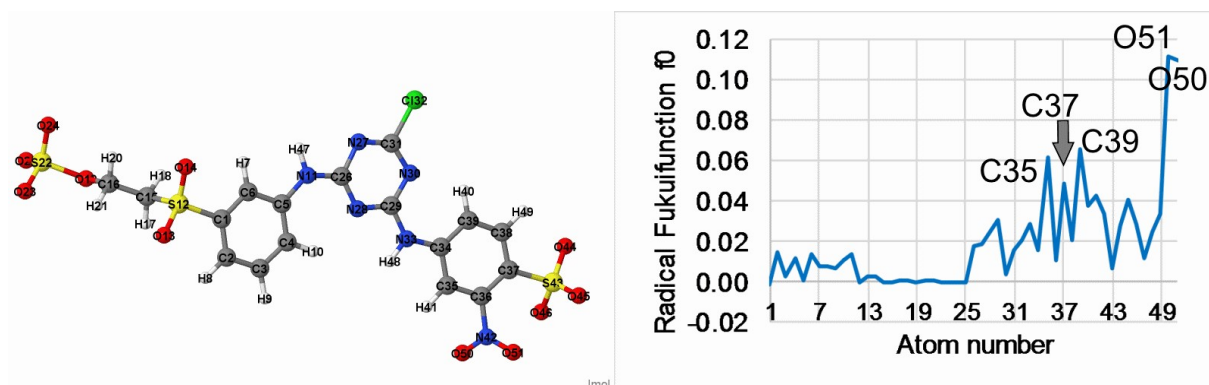

**Figure S1.** The optimized structure and radical Fukui function plot of A1.

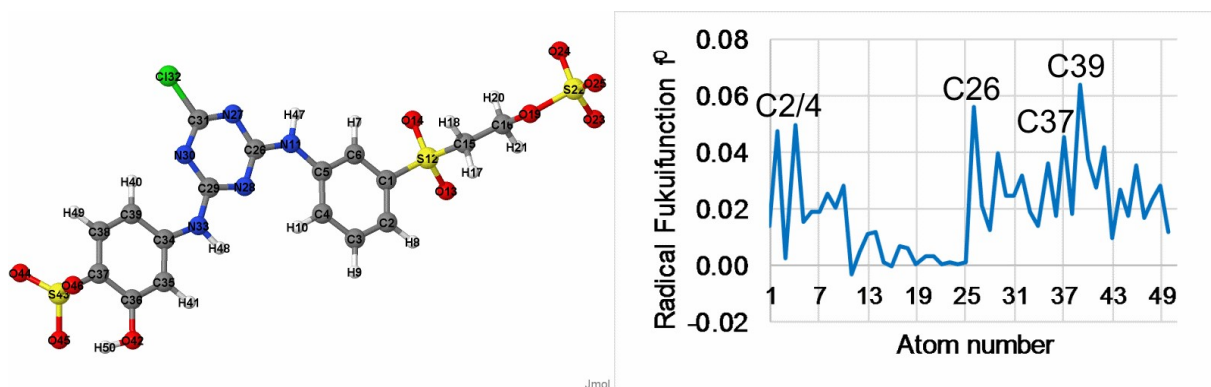

**Figure S2.** The optimized structure and radical Fukui function plot of A2.

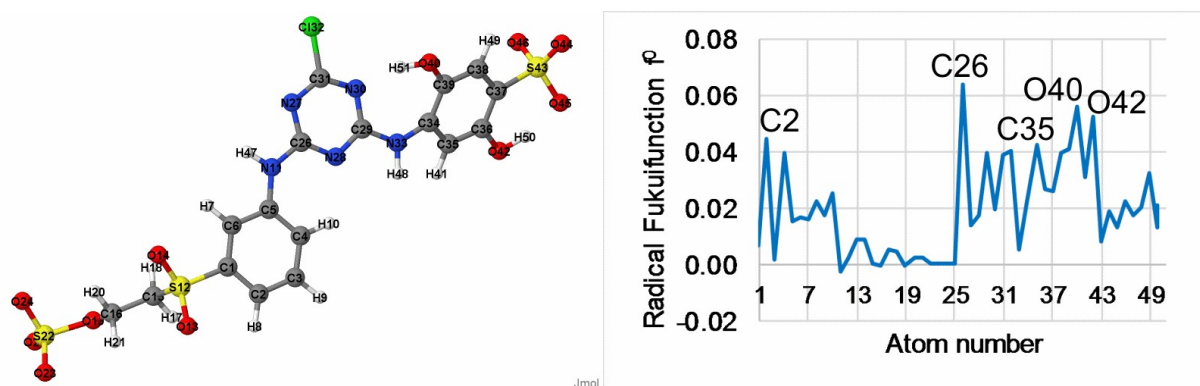

**Figure S3.** The optimized structure and radical Fukui function plot of A3.

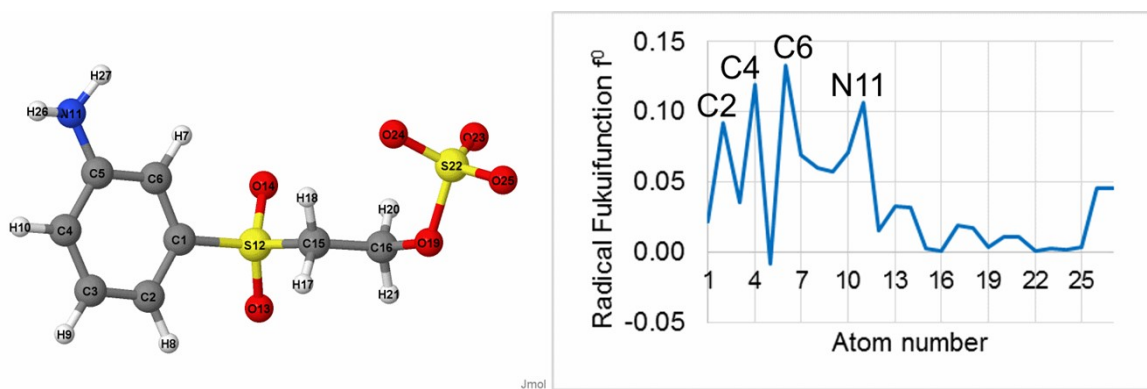

**Figure S4.** The optimized structure and radical Fukui function plot of A4a.

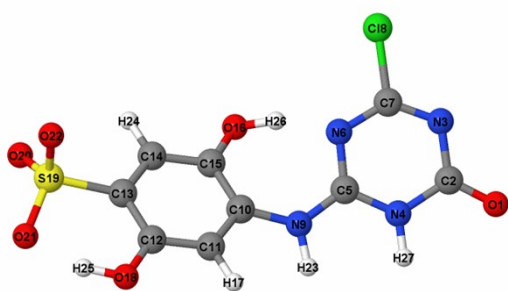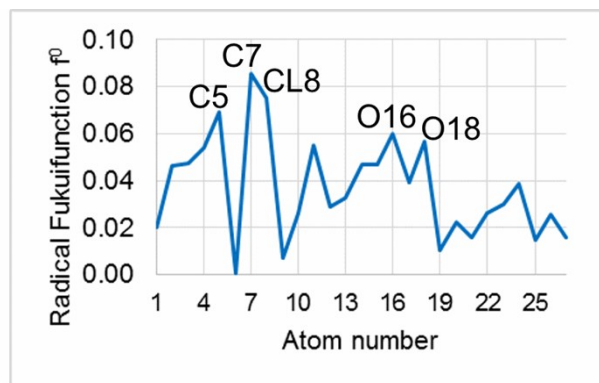

Jmol

**Figure S5.** The optimized structure and radical Fukui function plot of **A4b**.

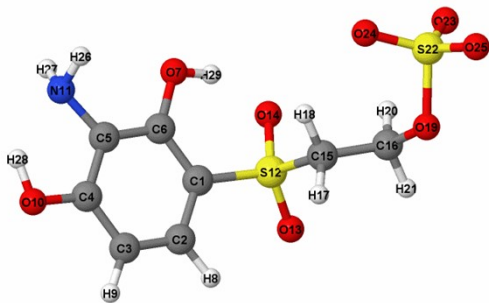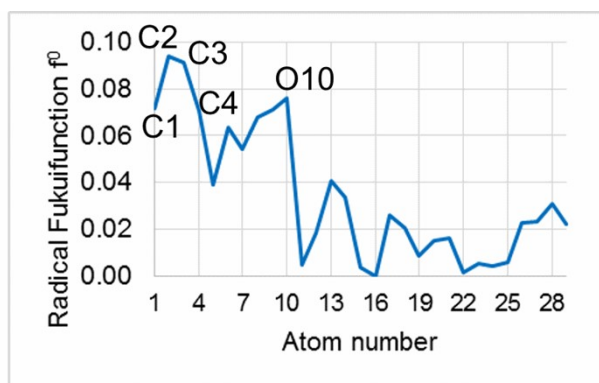

Jmol

**Figure S6.** The optimized structure and radical Fukui function plot of **A5a**.

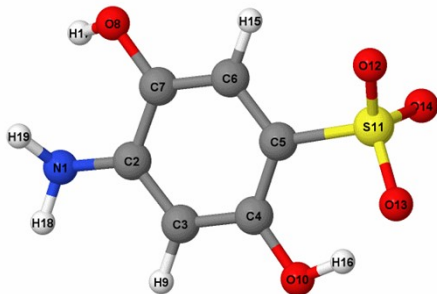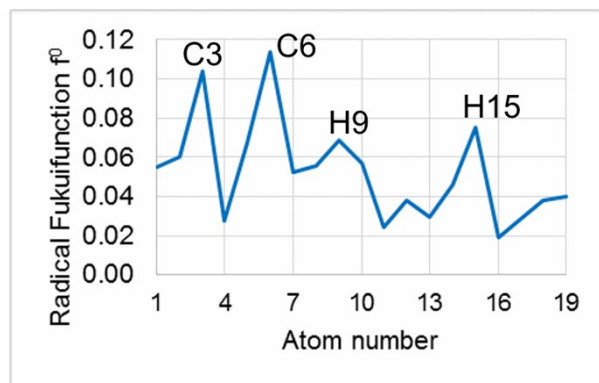

Jmol

**Figure S7.** The optimized structure and radical Fukui function plot of **A5b**.

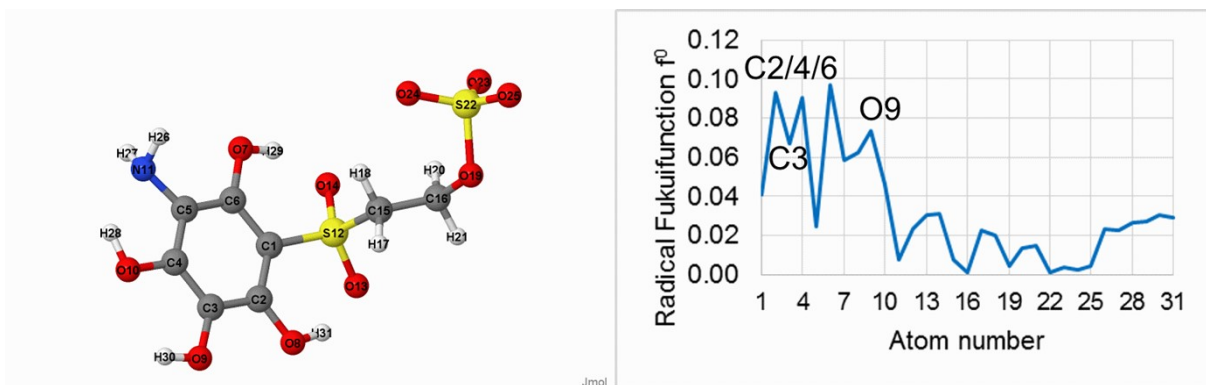

**Figure S8.** The optimized structure and radical Fukui function plot of **A6a**.

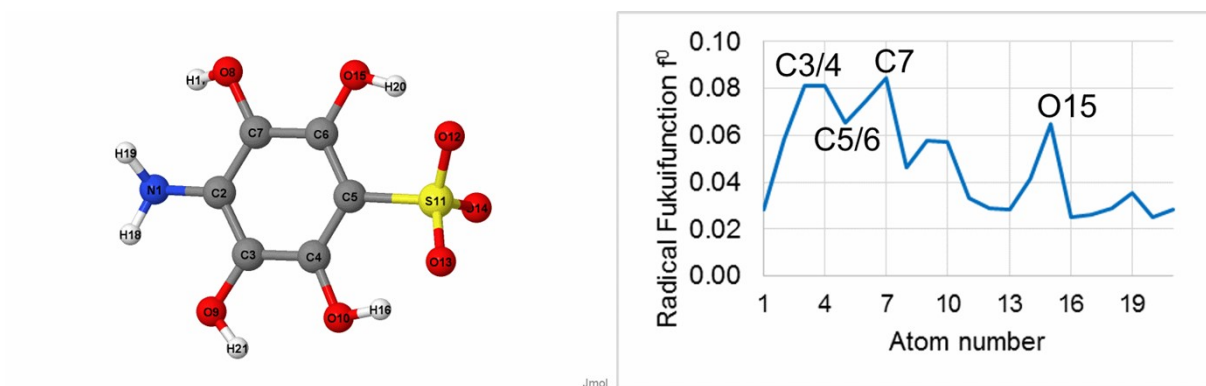

**Figure S9.** The optimized structure and radical Fukui function plot of **A6b**.

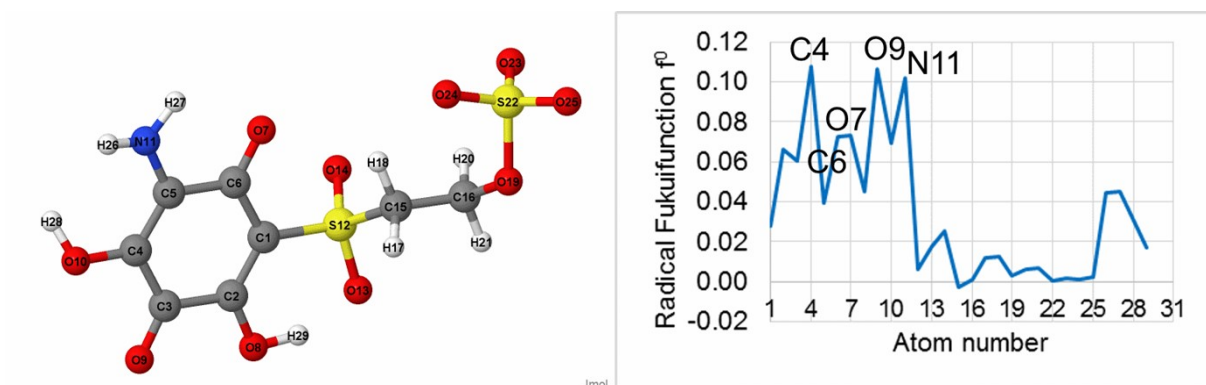

**Figure S10.** The optimized structure and radical Fukui function plot of **A7a**.

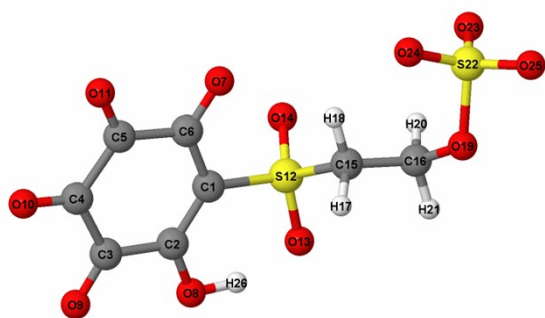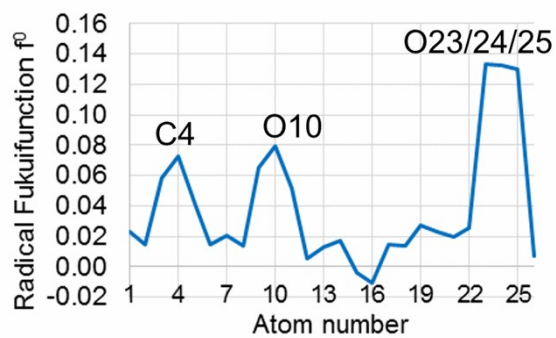

Jmol

**Figure S11.** The optimized structure and radical Fukui function plot of **A8a**.

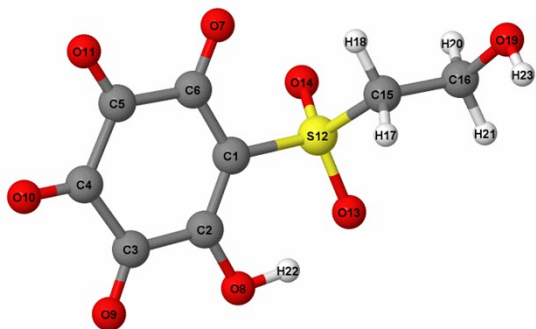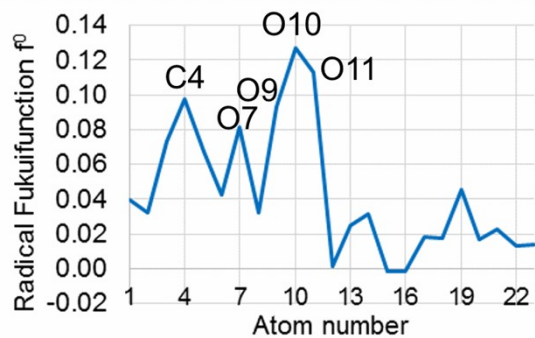

Jmol

**Figure S12.** The optimized structure and radical Fukui function plot of **A9a**.

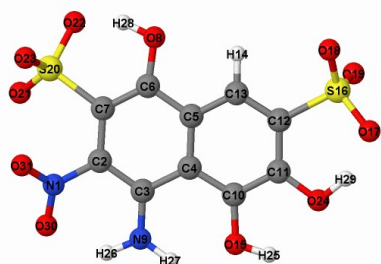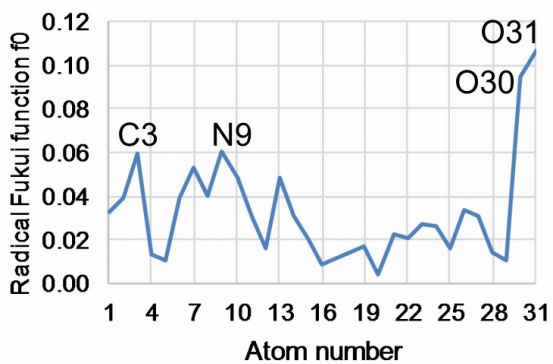

Jmol

**Figure S13.** The optimized structure and radical Fukui function plot of **B1**.

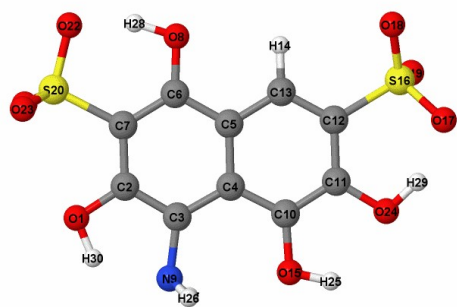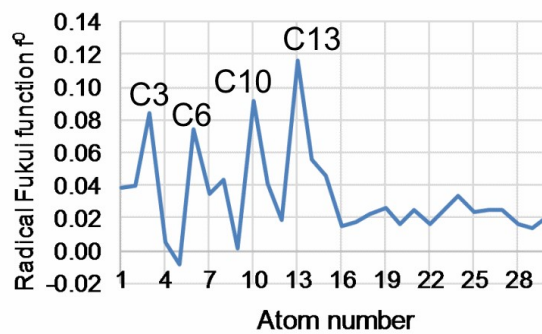

Jmol

**Figure S14.** The optimized structure and radical Fukui function plot of B2.

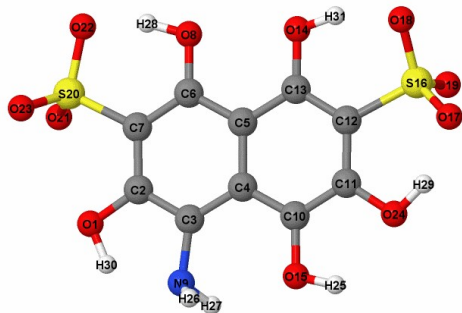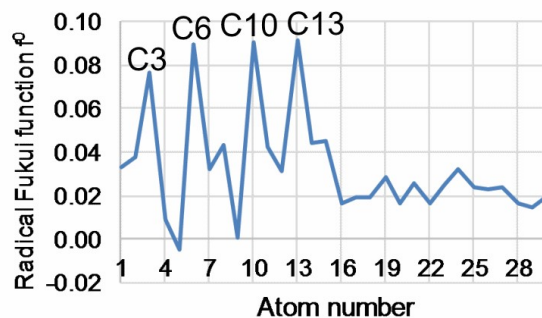

Jmol

**Figure S15.** The optimized structure and radical Fukui function plot of B3.

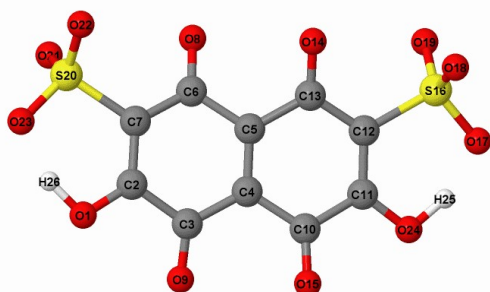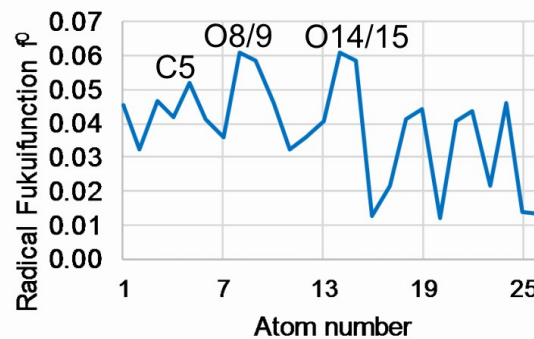

Jmol

**Figure S16.** The optimized structure and radical Fukui function plot of B4.

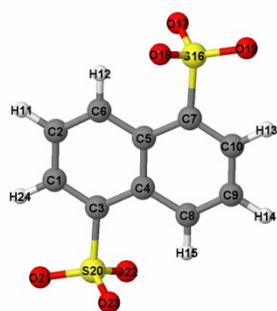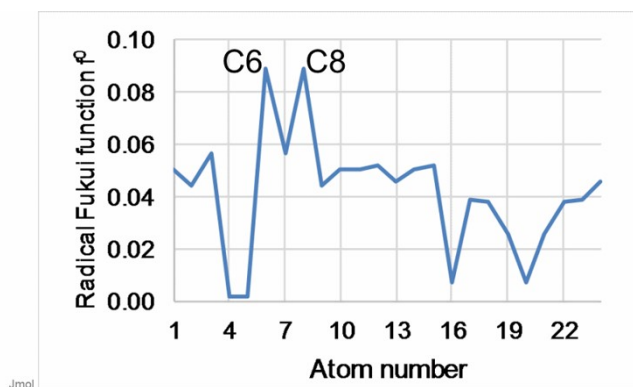

**Figure S17.** The optimized structure and radical Fukui function plot of C1.

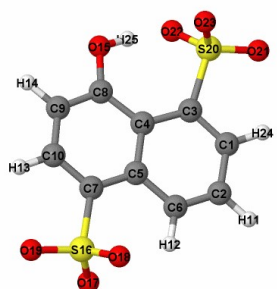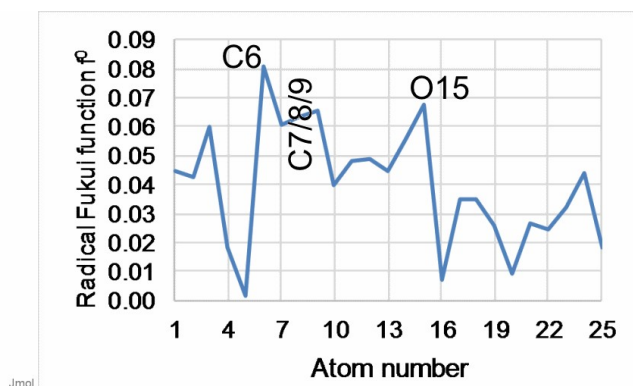

**Figure S18.** The optimized structure and radical Fukui function plot of C2.

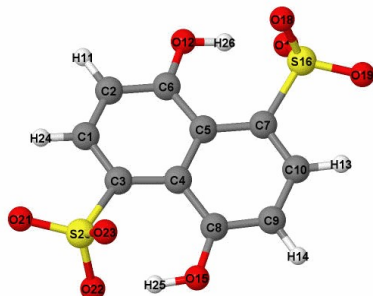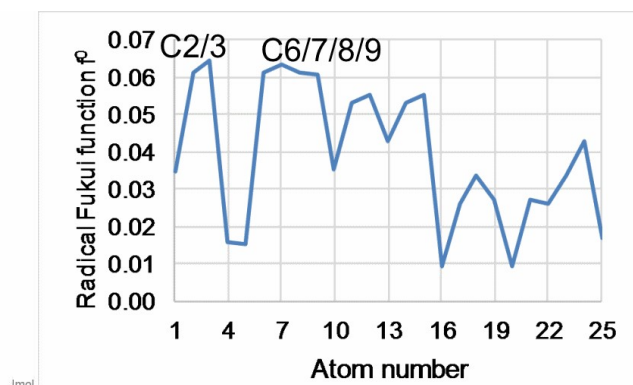

**Figure S19.** The optimized structure and radical Fukui function plot of C3.
